1 Epigenetic influences on aging: a longitudinal genome-wide methylation  
2 study in old Swedish twins

3 Yunzhang Wang<sup>1</sup>, Robert Karlsson<sup>1</sup>, Erik Lampa<sup>2</sup>, Qian Zhang<sup>3</sup>, Åsa K. Hedman<sup>4,5</sup>, Malin  
4 Almgren<sup>6</sup>, Catarina Almqvist<sup>1,7</sup>, Allan F. McRae<sup>3</sup>, Riccardo Marioni<sup>8,9,10</sup>, Erik Ingelsson<sup>4,11</sup>, Peter  
5 M. Visscher<sup>3,9</sup>, Ian J. Deary<sup>10</sup>, Lars Lind<sup>2</sup>, Tiffany Morris<sup>12</sup>, Stephan Beck<sup>12</sup>, Nancy L. Pedersen<sup>1</sup>,  
6 and Sara Hägg<sup>1\*</sup>

7 1. Department of Medical Epidemiology and Biostatistics, Karolinska Institutet, Stockholm,  
8 Sweden

9 2. Department of Medical Sciences, Cardiovascular Epidemiology, Uppsala University,  
10 Uppsala, Sweden

11 3. Institute for Molecular Bioscience, The University of Queensland, Brisbane, Queensland  
12 4072, Australia

13 4. Department of Medical Sciences, Molecular Epidemiology and Science for Life  
14 Laboratory, Uppsala University, Uppsala, Sweden

15 5. Cardiovascular Medicine unit, Department of Medicine Solna, Karolinska Institute,  
16 Stockholm, Sweden

17 6. Department of Clinical Neuroscience, Centrum for Molecular Medicine, Karolinska  
18 Institutet, Stockholm, Sweden

19 7. Astrid Lindgren Children's Hospital, Karolinska University Hospital, Stockholm, Sweden

20 8. Centre for Genomic and Experimental Medicine, University of Edinburgh, United  
21 Kingdom

22 9. The Queensland Brain Institute, The University of Queensland, St Lucia, QLD 4072,  
23 Australia

24 10. Centre for Cognitive Ageing and Cognitive Epidemiology, Department of Psychology,  
25 University of Edinburgh, United Kingdom

26 11. Department of Medicine, Division of Cardiovascular Medicine, Stanford University School  
27 of Medicine, Stanford, CA 94305, USA

28 12. Cancer Institute, University College London, London, United Kingdom

29 Email: [Yunzhang.wang@ki.se](mailto:Yunzhang.wang@ki.se); [Robert.karlsson@ki.se](mailto:Robert.karlsson@ki.se); [erik.lampa@ucr.uu.se](mailto:erik.lampa@ucr.uu.se);  
30 [gian.zhang@uq.net.au](mailto:gian.zhang@uq.net.au); [asa.hedman@ki.se](mailto:asa.hedman@ki.se); [malin.almgren@ki.se](mailto:malin.almgren@ki.se); [Catarina.almqvist@ki.se](mailto:Catarina.almqvist@ki.se);  
31 [a.mcrae@uq.edu.au](mailto:a.mcrae@uq.edu.au); [rmarioni@exseed.ed.ac.uk](mailto:rmarioni@exseed.ed.ac.uk); [eriking@stanford.edu](mailto:eriking@stanford.edu);  
32 [peter.visscher@uq.edu.au](mailto:peter.visscher@uq.edu.au); [jand@exseed.ed.ac.uk](mailto:jand@exseed.ed.ac.uk); [lars.lind@medsci.uu.se](mailto:lars.lind@medsci.uu.se);  
33 [tiffany@ceqz.co.uk](mailto:tiffany@ceqz.co.uk); [s.beck@ucl.ac.uk](mailto:s.beck@ucl.ac.uk); [nancy.pedersen@ki.se](mailto:nancy.pedersen@ki.se); [sara.hagg@ki.se](mailto:sara.hagg@ki.se);

34

35 \*Corresponding author:

36 Dr. Sara Hägg, Associate Professor, Department of Medical Epidemiology and Biostatistics,  
37 Karolinska Institutet, Nobels väg 12A, Stockholm 17177, Sweden,

38 Phone: +46-8-524 82236

## 39 **Abstract**

40 Age-related changes in DNA methylation have been observed in many cross-sectional studies,  
41 but longitudinal evidence is still very limited. Here, we aimed to characterize longitudinal age-  
42 related methylation patterns (Illumina HumanMethylation450 array) using 1011 blood samples  
43 collected from 385 old Swedish twins (mean age of 69 at baseline) up to five times over 20 years.  
44 We identified 1316 age-associated methylation sites ( $p < 1.3 \times 10^{-7}$ ) using a longitudinal  
45 epigenome-wide association study design. We measured how estimated cellular compositions  
46 changed with age and how much they confounded the age effect. We validated the results in two  
47 independent longitudinal cohorts, where 118 CpGs were replicated in PIVUS ( $p < 3.9 \times 10^{-5}$ ) and  
48 594 were replicated in LBC ( $p < 5.1 \times 10^{-5}$ ). Functional annotation of age-associated CpGs showed  
49 enrichment in CCCTC-binding factor (CTCF) and other unannotated transcription factor binding  
50 sites. We further investigated genetic influences on methylation (methylation quantitative trait  
51 loci) and found no interaction between age and genetic effects in the 1316 age-associated CpGs.  
52 Moreover, in the same CpGs, methylation differences within twin pairs increased over time,  
53 where monozygotic twins had smaller intra-pair differences than dizygotic twins. We show that  
54 age-related methylation changes persist in a longitudinal perspective, and are fairly stable  
55 across cohorts. Moreover, the changes are under genetic influence, although this effect is  
56 independent of age. In addition, inter-individual methylation variations increase over time,  
57 especially in age-associated CpGs, indicating the increase of environmental contributions on  
58 DNA methylation with age.

59 **Keywords:** DNA methylation, ageing, longitudinal study, meQTL, twin-pair analysis

60

61

62

## 63 **Introduction**

64 DNA methylation is known as a key factor in human aging (1). In the human aging process,  
65 alterations of DNA methylation indicate a loss of epigenetic control and relate to pathological  
66 phenotypes (2, 3). Today, epigenome-wide association studies (EWAS) have established  
67 general knowledge on age-related methylation patterns in humans (4–8). Overall, approximately  
68 30% of cytosine-phosphate-guanine (CpG) sites measured by Illumina 450k array are  
69 associated with age (7, 9). and they can be divided into hypo- or hypermethylations (10).  
70 Moreover, individual variation of DNA methylation partly depends on genetic variants and  
71 methylation is believed to be a mediator of genetic effects (11). Several studies on methylation  
72 quantitative trait loci (meQTL) have identified genetic associations with methylation (2, 12). In  
73 addition, it has been suggested that age-related methylation alterations depend on genetic  
74 effects (9), and another recent study on mother-children pairs reported that meQTL associations  
75 were stable over time (12). Twin studies of the epigenome have been used to estimate  
76 methylation heritability (9, 13), and higher methylation correlation has been observed in  
77 monozygotic (MZ) than dizygotic (DZ) twin pairs (5, 14). However, the change of intra-twin-pair  
78 methylation difference over time has not been studied.

79 To date, most EWAS publications on age used cross-sectional data, while longitudinal studies  
80 on intra-individual change in methylation over time are still sparse (15). Hence, the aim of this  
81 study was to investigate longitudinal age-related alterations in DNA methylation, using whole  
82 blood samples from old Swedish twins (mean age of 69 at baseline) collected up to five times  
83 across 20 years. Age-associated CpGs were then validated in two independent longitudinal  
84 cohorts. Age-related changes of cellular compositions were estimated and their effects on age-  
85 related change of methylation were measured. In addition, we analyzed meQTL associations  
86 and studied genetic effects on age-related methylation patterns over time, with specific  
87 emphasis on twin-pair differences.

## 88 Results

### 89 Longitudinal EWAS on age

90 Using the Illumina HumanMethylation450k array, DNA methylation data of 390,894 autosomal  
91 CpGs were obtained from 385 twins (73 MZ, 96 DZ complete twin pairs) enrolled in the Swedish  
92 Adoption/Twin Study of Aging (SATSA) (16) (Table 1), which is part of the Swedish Twin  
93 Registry (17). The longitudinal EWAS analysis revealed systematic changes of methylation with  
94 age. In total 1316 CpGs were identified as significantly associated with age using a Bonferroni-  
95 corrected threshold ( $p < 1.3 \times 10^{-7}$ ) (Figure S1, File S1), where 1026 CpGs were hypomethylated.  
96 The top CpG was found within the gene *ELOVL2* (Figure S2). Sex was adjusted for as a  
97 covariate in the model, and 6509 CpGs were significantly associated with sex ( $p < 1.3 \times 10^{-7}$ ), of  
98 which 16 were also found among the 1316 age-related CpGs. Overall, sex-associated CpGs  
99 were not enriched in the age-associated CpGs. A sensitivity analysis showed that twin zygosity  
100 had little impact on results.

101 Validation of age-associated CpGs was done in two independent longitudinal cohorts; the  
102 Prospective Investigation of the Vasculature in Uppsala Seniors (PIVUS) (18) and the Lothian  
103 Birth Cohort (LBC) (19). The PIVUS cohort measured methylation data from 196 individuals at  
104 age 70 and 80, and the LBC cohort, including two sub-cohorts of 906 and 436 individuals at  
105 baseline, measured blood samples at three time points, with mean ages of 70 and 79 at baseline  
106 (Table S1). Among the 1316 age-associated CpGs identified in SATSA, 1271 and 973 CpGs  
107 were available in PIVUS and LBC respectively. In PIVUS, 118 of the 1271 CpGs were consistent  
108 in effect directions and significant at a Bonferroni-correction threshold for validation  $p < 3.9 \times 10^{-5}$ .  
109 In LBC, 594 out of 973 CpGs were consistent in effect directions and significant with  $p < 5.1 \times 10^{-5}$ .  
110 The correlation of effect sizes between PIVUS and SATSA was 0.57, and 0.87 between LBC  
111 and SATSA (Figure 1).

## 112 **Cellular compositions change with age**

113 Cellular compositions were estimated from methylation data using the method by Houseman (20)  
114 and the longitudinal change of cellular compositions with age was measured using a mixed  
115 effect model. The total peripheral blood mononuclear cell (PBMC) proportions increased with  
116 age ( $p=4.6\times 10^{-8}$ ) while granulocytes proportions decreased with age ( $p=1.1\times 10^{-4}$ ). Within  
117 PBMCs, CD14+ monocytes ( $p=9.4\times 10^{-16}$ ) and natural killer cells ( $p=6.0\times 10^{-4}$ ) significantly  
118 increased with age, while CD19+ B cells decreased with age ( $p=9.2\times 10^{-4}$ ). Within granulocytes,  
119 eosinophils increased with age ( $p=2.6\times 10^{-4}$ ) while neutrophils did not change with age (Figure 2).  
120 However, in general, age only explains a small proportion of the variance of cellular  
121 compositions in our cohort (Figure 2, File S1).

122 Furthermore, the adjustment of cellular compositions in the 1316 age-associated CpGs only  
123 slightly increases the effect sizes of age, especially for hypermethylated CpGs. In total, 246  
124 CpGs were significantly ( $p<3.8\times 10^{-5}$ ) associated with at least one cell type and 40 of them were  
125 associated with all estimated cell types. However, effect sizes of most CpGs did not change  
126 much (Figure S3, File S1).

## 127 **Regulatory and functional annotations of age-associated CpGs**

128 The CpG island locations of the identified age-associated CpGs were obtained from the Illumina  
129 manifest file. Age-associated CpGs were less frequently found in CpG islands and open sea  
130 regions, and more frequently in CpG shores among the probes designed in the 450k chip. The  
131 majority (1026 of 1316) of the CpGs showed decreased methylation with age, and among the  
132 hypermethylated CpGs, the majority (85.2%) were located in CpG islands (**Error! Reference**  
133 **source not found.A**).

134 To explore biological functions, we annotated the age-associated CpGs using regulatory  
135 features from the Ensembl database, showing CpGs in relation with regulatory protein binding

136 sites (21). Compared to regulatory features of the 450k probe background, age-associated  
137 CpGs were found enriched in CTCF binding sites, promoter flanking regions and other  
138 transcription factor binding sites (Figure 3B). In particular, a much higher proportion of  
139 hypermethylated CpGs were found in transcription factor binding sites than other regulatory  
140 features.

141 We further mapped the 1316 age-associated CpGs to 878 genes according to the Illumina  
142 manifest file. Consequently, genes were annotated using the Database for Annotation,  
143 Visualization and Integrated Discovery (DAVID) online tool (22, 23), and 85.3% of the genes  
144 were categorized according to the biological process term of gene ontology (GO). Seven GO  
145 terms were found significantly enriched (false discovery rate [FDR] < 0.05), and the top function  
146 was homophilic cell adhesion via plasma membrane adhesion molecules (Table 2). Moreover,  
147 many of the genes were found to be enriched in functions related to nervous system  
148 development and neurogenesis.

### 149 **Identification of *cis*-meQTLs**

150 To investigate genetic influences on methylation, *cis*-meQTLs (distance between markers <1  
151 million base pairs) from 1.9 billion possible associations between 6.5 million single nucleotide  
152 polymorphisms (SNPs) and 390,894 CpGs across the genome were analyzed. Over 1.4 million  
153 associations were statistically significant using a Bonferroni-corrected threshold ( $p < 2.5 \times 10^{-11}$ ).  
154 As expected, we observed more associations and lower p-values when SNPs were closer to  
155 their associated CpGs (Figure S4). In total, 14,714 CpGs were significantly associated with at  
156 least one SNP.

157 Overall, our results were consistent with associations in the mQTL database (12). About 44% of  
158 SNP-CpG associations identified in SATSA were also significant ( $p < 10^{-14}$ ) in the middle-age  
159 group in the mQTL database. Also, 8950 out of the 14,714 (61%) SNP-associated CpGs

160 identified in SATSA were also significantly ( $p < 10^{-14}$ ) associated with SNPs in the mQTL  
161 database.

## 162 **Genetic effects on age-associated CpGs**

163 To investigate the relationship between age and genetic effects on methylation, we specifically  
164 studied CpGs that were significantly associated with both age and genetic variants. Among the  
165 1316 age-associated CpGs discovered in the longitudinal analysis, 123 (9.3%) were also  
166 associated with at least one SNP. The proportion of genetic-associated CpGs among the age-  
167 associated CpGs (9.3%) was higher than the proportion in all CpGs (3.7%;  $p = 6.7 \times 10^{-26}$ ). For  
168 each of those CpGs, a longitudinal mixed effect model was performed including the associated  
169 SNP with the lowest p-value as a covariate. The age effects were still significant after adjusting  
170 for top associated SNPs (File S2). Moreover, interactions between age and SNPs were tested in  
171 the models as covariates, and no significant interaction was observed.

## 172 **Methylation differences within twin pairs**

173 We further calculated standardized Euclidean distances from genome-wide methylation data to  
174 measure intra-pair differences between MZ and DZ twins over time (Table S3). Taking all CpGs  
175 into account, distances within twin pairs increased significantly with age ( $\beta = 0.021$ ,  $p = 9.4 \times 10^{-4}$ )  
176 (Figure 4A), with steeper slopes when using the 1316 age-associated CpGs only ( $\beta = 0.029$ ,  
177  $p = 2.9 \times 10^{-5}$ ; Figure 4B). The slope of the age effect on methylation differences in SNP-  
178 associated CpGs was smaller than that of all CpGs ( $\beta = 0.015$ ,  $p = 3.32 \times 10^{-5}$ ; Figure 4C).

179 Furthermore, MZ and DZ twins showed significant intra-twin-pair Euclidean distances based on  
180 all CpGs, where MZ twins had significantly smaller distances compared to DZ twins ( $\beta = 0.499$ ,  
181  $p = 1.0 \times 10^{-4}$ ; Figure 4A). In particular, the difference was much clearer for the 14714 SNP-  
182 associated CpGs ( $\beta = 1.689$ ,  $p = 1.46 \times 10^{-65}$ ; Figure 4C). The difference between zygosity for the



183 1316 age-associated CpGs was significant and the effect size is larger than that of all CpGs  
184 ( $\beta=0.697$ ,  $p=6.75\times 10^{-8}$ ; Figure 4B).

185 Moreover, for each CpG, we performed an intra-twin-pair analysis to measure how much each  
186 one of them contributed to the total increasing methylation distances within twin pairs. Although  
187 no CpG passed the Bonferroni threshold ( $p<1e-7$ ), almost all CpGs with  $p<0.05$  have positive  
188 estimates of age, indicating that the differences in global methylation patterns between twins  
189 increased over time (Figure S5). On average, the age-associated CpGs have a higher effect size  
190 compared to all CpGs (15% higher,  $p=4.18\times 10^{-5}$  from a t-test), explaining the steeper slope of  
191 age-associated CpG in Figure 4. However, the CpGs that contributed to the growing intra-twin-  
192 pair methylation distances ( $p<0.05$ ), have a much larger mean effect size than age-associated  
193 CpGs (Figure S5).

## 194 Discussion

195 In this study, we characterized longitudinal age-related DNA methylation patterns in old twins,  
196 and identified 1316 CpGs associated with age. The strongest age-associated CpG was found in  
197 the promoter of the *ELOVL2* gene. Also, we described the longitudinal change of estimated  
198 cellular compositions with age and how cellular compositions affect age-associated methylation  
199 patterns. Moreover, genetic effects were observed for some age-associated CpGs, but they  
200 were independent of age effects. Furthermore, analyses of methylation differences within twin  
201 pairs revealed increasing differences over time, where MZ twins showed smaller dissimilarities  
202 than DZ twins in age-associated CpGs.

203 The age-related CpGs from SATSA were successfully validated in the longitudinal cohort LBC,  
204 but not so consistent in PIVUS. The LBC cohort validated 594 of the 1316 age-related CpGs at  
205  $p<5.1\times 10^{-5}$ , with a large sample size and three longitudinal waves. The high correlation of effect

206 sizes of age ( $r=0.87$ ) between SATSA and LBC indicated that LBC verified the effect sizes  
207 estimated by SATSA as well. The PIVUS cohort validated 118 of the 1316 CpGs at  $p<3.9\times 10^{-5}$   
208 and had an intermediate correlation ( $r=0.57$ ) of age effect sizes with SATSA. Specifically, PIVUS  
209 failed to validate the convincing top hit cg16867657 from SATSA. One explanation could be that  
210 the PIVUS cohort only collected data from participants at two ages, 70 and 80 years. Thus, the  
211 PIVUS cohort was quite different from SATSA in study design, where SATSA had up to five  
212 longitudinal waves and a much wider age range (49-99 year). Moreover, the age-related CpGs  
213 identified in this study were generally consistent with several published cross-sectional studies  
214 using 450k data (Table S). Johansson (7) and Dongen (9) reported around 30% of all CpGs to  
215 be age-related, which overlapped with a majority (91% and 66% respectively) of the 1316 age-  
216 associated CpGs we identified. Florath (8) only reported 162 significant CpGs and half were also  
217 found in SATSA. Our results did not overlap much with the longitudinal study by Tan (15),  
218 however, the set-up of the study with data from 43 twin pairs at two time points (10 years apart)  
219 was again different from ours. In general, when conducting a longitudinal EWAS study, many  
220 more covariates come into place and technical variation from different waves could bias the  
221 estimates. The SATSA methylation samples, however, were completely randomized on  
222 methylation arrays across waves. Overall, much of published cross-sectional results were  
223 relevant also in our longitudinal study, indicating that age-associated methylation alterations are  
224 persistent over time.

225 Cellular compositions estimated from methylation data are useful to show how white blood cells  
226 change with age. In our longitudinal cohort, T cell compositions were not observed to decrease  
227 with age, while the changes of other cell types were in accordance to a previous study (24). The  
228 discrepancy in T cells between studies may highlight differences regularly observed between  
229 cross-sectional and longitudinal associations where the former sometimes overestimate an  
230 association with age. However, it may also be explained by technical artifacts because many

231 samples had cellular estimates very close to zero, making it difficult to perform good regression  
232 analyses. In addition, in spite of the observed cellular composition changes with age, they  
233 contributed little to the 1316 age-associated CpGs, where estimates of age were similar with and  
234 without adjusting for cellular compositions.

235 Regulatory annotation of age-associated CpGs indicated enrichment in predicted CTCF binding  
236 sites, promoter flanking regions and unannotated TF binding sites. DNA methylation has been  
237 reported to regulate CTCF binding to DNA, which in turn regulates gene expression through long  
238 range interactions with enhancers and promoters (25). Thus, we suggest that this methylation of  
239 CTCF is important in the aging process. Hypermethylated CpGs were not enriched in promoter  
240 regions, where age-related hypermethylation was believed to occur. Instead, hypermethylated  
241 CpGs were commonly associated with TF binding sites than in other regulatory regions,  
242 indicating the importance of age-related hypermethylation which occurs in TF binding sites  
243 unannotated to known regulatory features. The mechanism of age-related methylation in  
244 enhancers and open chromatin regions were not clear, because these regions were poorly  
245 covered by the 450k array.

246 The meQTL analysis identified a large number of CpG-SNP associations and showed that  
247 genetic variants have strong effects on DNA methylation. The higher proportion of genetic-  
248 associated CpGs found among the age-associated CpGs (9.2%) than in all CpGs (3.7%)  
249 indicates enriched genetic impact on age-related methylation. Our results suggested no  
250 interaction between genetic and age effects on methylation, which supports the conclusion by  
251 Gaunt (12) that genetic effects on methylation are stable over time. Similarly, heritability  
252 analyses by Tan (15) showed that intra-individual longitudinal change of age-associated CpGs  
253 was mostly (90%) explained by individual specific environmental factors. Thus, genetic variants  
254 can affect methylation levels of age-associated CpGs, but not the speed of methylation changes

255 over time. A previous study on methylation heritability (9) suggested gene-age interactions on  
256 methylation, but they were not detected in our study.

257 Furthermore, twin-pair methylation differences using information from all CpGs indicated a global  
258 increase in inter-individual methylation variations over time. This increase is probably due to  
259 both environmental and stochastic factors. Especially, the increase in methylation differences  
260 was stronger (steeper slope) in the age-associated CpGs. Thus, age-associated CpGs not only  
261 change with age, but also have higher age-induced variations than average. The result could  
262 imply that age-related methylation is more vulnerable to environmental and stochastic effects.  
263 Also, comparing MZ and DZ twins showed that genetic effects were stronger in the age-  
264 associated CpGs than all CpGs. It corresponded with meQTL results that a higher proportion of  
265 SNP-associated CpGs were found in age-associated CpGs.

266 The strength of this study was the use of longitudinal methylation data with repeated measures  
267 sampled up to five times over 20 years in the same individuals. Moreover, we successfully  
268 validated our results in two independent longitudinal studies with high correlations of effect sizes.  
269 Although blood samples were collected, stored, and DNA extracted at different times,  
270 methylation data were measured and processed together with complete randomization.  
271 Therefore, we largely reduced the influences of uncorrected batch effects in the analysis. The  
272 twin design further enabled us to investigate methylation differences within twin pairs to  
273 specifically study environmental influences on methylation.

274 Among the limitations for this study was that it was performed on a relatively small number of  
275 subjects (N=385) and some people only participated in one or two measures. Moreover, the  
276 results are only applicable in the old ages and for European ancestry populations.

277 Further, methylation data were obtained from 450k arrays, which have poor coverage of  
278 enhancer regions, an important feature of gene regulation. Also, the quality of data from

279 methylation arrays is not always perfect due to potential unspecific hybridization and noises in  
280 signal detection. Stronger evidence could be provided by data from bisulfite pyrosequencing  
281 methods as validation.

282 DNA methylation includes both cell-specific and unspecific patterns. Some evidence show that  
283 age-related hypermethylation are more conserved across different tissues than hypomethylation  
284 (5, 26). However, we only studied blood samples and adjusted methylation data using estimated  
285 cellular compositions (20). Further investigation on cell-type specific and unspecific methylation  
286 alterations in longitudinal studies may reveal methylation patterns in relation to cell types, since  
287 cellular composition changes across age in blood (24).

## 288 **Materials and Methods**

### 289 **Study aim, design and settings**

290 This study used methylation data of people involved in SATSA (16), which aims to understand  
291 individual differences in aging. The SATSA is part of the Swedish Twin Registry (STR) (17),  
292 which is a population-based national register including twins born 1886-2000. The SATSA  
293 started in 1984, and continuously collected cognitive and health data every third year with up to  
294 ten waves in a total of 861 participants.

### 295 **Study population**

296 Blood samples were obtained from 402 SATSA participants, including 85 MZ and 116 DZ twin  
297 pairs. We collected in total 1122 samples at five time-points starting from 1992 to 2012. After  
298 quality control on methylation data, we retained 1011 samples from 385 twins. In the five  
299 longitudinal waves, numbers of participants with 1 to 5 measurements were 99, 86, 90, 80, 30  
300 (Table 1). Among them, 200 participants were measured at least three times. Phenotype data

301 were collected through comprehensive questionnaires and physical testing at each sampling  
302 wave. Phenotypes used in this study include chronological age, sex, zygosity.

### 303 **Methylation data**

304 For each sample, 200 ng of DNA were bisulfite converted using the EZ-96 DNA MagPrep  
305 methylation kit (Zymo Research Corp., Orange, CA, USA) according to the manufacturer's  
306 protocol optimized for Illumina's Infinium 450K assay. The bisulfite converted DNA samples were  
307 hybridized to the Infinium HumanMethylation450 BeadChips by the University College London  
308 Genomics Core Facility according to Illumina's Infinium HD protocol (Illumina Inc., San Diego,  
309 CA, USA). Samples were randomly distributed into 13 plates. DNA methylation levels of 485,512  
310 CpGs were measured for each sample.

311 We processed raw methylation data using the R package RnBeads (27). Quality control (QC)  
312 was performed in two steps removing; 1) samples having low median signal intensities, wrong  
313 predicted sex, or poor correlations ( $r < 0.7$ ) with genetic controls; 2) probes overlapping with a  
314 SNP and non-CpG probes. Additionally, we employed a greedy-cut algorithm that iteratively  
315 filtered out probes and samples. This was done by maximizing false positive rate minus  
316 sensitivity with a detection p-value cutoff of 0.05. In the end, probes on sex chromosomes were  
317 removed. After QC, we retained 1011 samples and 390,894 probes.

318 Subsequently, we used a background correction method "noob" (28) from the methylumi  
319 package and a normalization method "dasen" (29) from the watermelon package. Next, we  
320 corrected normalized data for cellular compositions, which were estimated by the Houseman  
321 method (20) using a blood cell reference panel (30). In order to detect and remove technical  
322 variance, we used the Sammon mapping method (31) to achieve a lower-dimension projection  
323 preserving the original data structure. The low-dimensional data were then fitted to a linear  
324 regression model to test potential batch effects. The strongest batch effects were identified as

325 array slides, and corrected for using the ComBat method from the R package sva (32). Data  
326 (beta-values) were then transformed to M-values for statistical analysis through a logit  
327 transformation.

$$328 \quad M = \log_2 \left( \frac{Beta}{1 - Beta} \right) \quad (1)$$

329

### 330 **Genotype data and imputation**

331 We generated genotype data using the Illumina PsychChip (Illumina Inc., San Diego, CA, USA),  
332 which detected 588,454 SNPs for each individual. We applied QC criteria by removing; 1)  
333 samples having >1% missing genotype, estimated inbreeding coefficient >3 standard deviations  
334 from the sample mean, wrong relatedness between individuals and wrong predicted sex; 2)  
335 SNPs not mapped to a chromosome, with over 2% missing calls, deviating from the Hardy-  
336 Weinberg equilibrium ( $p < 10^{-6}$ ) and with no observed minor alleles.

337 After QC, we performed pre-phasing on genotype data using SHAPEIT v2.r837 with default  
338 parameters. Imputation was then performed in chunks of around 5 Mb using IMPUTE2 version  
339 2.3.2 with default parameters (33). The imputation reference was based on the 1000 Genomes  
340 Project phase 1 (34). Next, a QC step was performed on imputed genotype data to filter out low  
341 imputation quality variants ( $\text{Info} < 0.6$ ) and low minor allele frequency variants ( $\text{MAF} < 0.05$ ). After  
342 imputation and QC, in total 363 individuals from SATSA had genetic data including 6,528,198  
343 imputed SNPs.

### 344 **PIVUS and LBC cohorts**

345 The PIVUS (18) study included 390 samples from 196 individuals collected at two specific ages,  
346 70 and 80 years. Half of the participants from PIVUS were women. Methylation data were

347 obtained from blood samples using the Illumina 450k array which has been described previously  
348 (35).

349 The LBC study was composed of two different birth cohorts, LBC1936 and LBC1921 (19), with  
350 3018 samples collected in max of three time points. In the three waves, LBC1936 included 906,  
351 801 and 619 individuals with mean ages of 69.6, 72.5 and 76.3 years; LBC1921 included 436,  
352 174, 82 individuals with mean ages of 79.1, 86.7 and 90.2 years. Proportions of women were  
353 49.4% and 53.7% in LBC1936 and LBC1921 at baseline. Methylation data were obtained from  
354 blood samples using the Illumina 450k array as presented elsewhere (13).

### 355 **Statistical analyses**

356 We fitted a linear mixed model to describe longitudinal changes of methylation with age. The  
357 model included fixed effects of age and sex, and random intercepts and slopes between twins  
358 nested in twin pairs. In the model formula below,  $i$ ,  $j$  and  $k$  denote twins, twin pairs and time  
359 points;  $\gamma$ ,  $\beta_1$ ,  $\beta_2$ ,  $u$ ,  $\omega$  and  $\varepsilon$  denote fixed intercept, fixed coefficient of age, fixed coefficient of sex,  
360 random intercept, random coefficient of age and random error.

$$361 \quad M_{i,j,k} = \gamma_0 + \beta_1 Age_{i,j,k} + \beta_2 Sex_i + u_{i,j} + \omega_{i,j} Age_{i,j,k} + \varepsilon_{i,j,k} \quad (2)$$

362 The sensitivity analysis on twin zygosity adjusted zygosity as a random effect in the mixed model.

363 We used two longitudinal cohorts, PIVUS and LBC, to validate our results. In PIVUS validation, a  
364 linear regression model using general least squares was performed to estimate methylation  
365 changes over 10 years for each CpG. Confounders included sex, smoking status, cell counts  
366 and batch effects were adjusted for in the model. In LBC validation, a mixed effect model  
367 allowing for random intercepts and slopes of age were performed to measure age-associated  
368 methylation longitudinally. Cell counts was adjusted as a covariate, and sex, sub-cohort, plates,  
369 array, position and hybridization date were adjusted as random effects.



370 The *cis*-meQTL analysis was performed on 363 participants in SATSA with both genotype and  
371 methylation data available. Methylation data from the first observation were used to identify  
372 meQTLs. To reduce the computational complexity, we employed the R package matrixEQTL (36)  
373 to perform a fast rough screening for *cis*-meQTLs. Genotypes were treated to have additive  
374 effects in the model. The screening method used a linear regression model, including age, sex  
375 and the first four genetic principle components as covariates, to calculate all *cis*-methylation-  
376 genotype associations. We selected associations with  $p < 1 \times 10^{-8}$  from the screening results and  
377 further fit to a linear regression model including the same covariates. After that, sandwich  
378 estimators were used to correct standard errors for the effect of having correlated observations  
379 from twins in the sample.

380 The intra-twin-pair differences of methylation patterns were measured by Euclidean distances.  
381 Methylation distances were calculated within twin pairs at the same time point across the CpGs  
382 used. In total 154 complete twin pairs (69 MZ, 85 DZ pairs, 660 samples) were available at the  
383 same time point. Methylation distances were standardized before regression.

384 Three sets of methylation distances were calculated using all CpGs, age-associated CpGs and  
385 SNP-associated CpGs respectively. Then, a linear mixed effect model was fitted to measure  
386 how intra-twin-pair methylation differences changed over time. The mixed effect model included  
387 age, sex and twin zygosity as fixed effects and twin pair as the random effect shown below,  
388 where  $i$  and  $j$  denote twin pairs and time points,  $\gamma$ ,  $\beta_1$ ,  $\beta_2$ ,  $\beta_3$ ,  $u$ , and  $\varepsilon$  denote fixed intercept, fixed  
389 coefficient of age, fixed coefficient of sex, fixed coefficient of zygosity, random intercept and  
390 random error.

391 
$$Distance_{i,j} = \gamma_0 + \beta_1 Age_{i,j} + \beta_2 Sex_i + \beta_3 Zygosity_i + u_i + \varepsilon_{i,j} \quad (3)$$

392 The probe-wise methylation distances were calculated from the absolute difference between M-  
393 values. The same regression model (Equation 3) was employed to estimate the change of intra-  
394 twin-pair distances overtime.

### 395 **Regulatory annotation and functional analysis**

396 We annotated genome locations and related regulatory features of identified age-associated  
397 CpGs using Ensembl Funcgen database (21). Regulatory features were classified according to  
398 the Ensembl Regulatory Build (37). In addition, we performed functional annotation on enriched  
399 genes using DAVID (22, 23) online tools.

400

### 401 **Ethics approval and consent to participate**

402 All participants in SATSA, PIVUS and LBC have provided written informed consents. This study  
403 was approved by the ethics committee at Karolinska Institutet with Dnr 2015/1729-31/5.

### 404 **Availability of data and material**

405 The datasets generated and/or analysed during the current study are available in the Gene  
406 Expression Omnibus repository, [PERSISTENT WEB LINK TO DATASETS]

### 407 **Competing interests**

408 EI is a scientific advisor for Precision Wellness, Cellink and Olink Proteomics for work unrelated  
409 to the present project.

### 410 **Funding and Acknowledgements**

411 The SATSA study was supported by NIH grants R01 AG04563, AG10175, AG028555, the  
412 MacArthur Foundation Research Network on Successful Aging, the Swedish Council for Working

413 Life and Social Research (FAS/FORTE) (97:0147:1B, 2009-0795, 2013-2292), the Swedish  
414 Research Council (825-2007-7460, 825-2009-6141, 521-2013-8689, 2015-03255), Karolinska  
415 Institutet delfinansiering (KID) grant for doctoral students (YW), the KI Foundation, and by Erik  
416 Rönnerbergs donation for scientific studies in aging and age-related diseases.

417

## 418 Reference

- 419 1. López-Otín,C., Blasco,M.A., Partridge,L., Serrano,M. and Kroemer,G. (2013) The Hallmarks  
420 of Aging. *Cell*, **153**, 1194–1217.
- 421 2. Bell,J.T., Pai,A.A., Pickrell,J.K., Gaffney,D.J., Pique-Regi,R., Degner,J.F., Gilad,Y. and  
422 Pritchard,J.K. (2011) DNA methylation patterns associate with genetic and gene expression  
423 variation in HapMap cell lines. *Genome Biol.*, **12**, R10.
- 424 3. Gentilini,D., Mari,D., Castaldi,D., Remondini,D., Ogliari,G., Ostan,R., Bucci,L., Sirchia,S.M.,  
425 Tabano,S., Cavagnini,F., *et al.* (2012) Role of epigenetics in human aging and longevity:  
426 genome-wide DNA methylation profile in centenarians and centenarians' offspring. *AGE*, **35**,  
427 1961–1973.
- 428 4. Hannum,G., Guinney,J., Zhao,L., Zhang,L., Hughes,G., Sada,S., Klotzle,B., Bibikova,M.,  
429 Fan,J.-B., Gao,Y., *et al.* (2013) Genome-wide Methylation Profiles Reveal Quantitative Views  
430 of Human Aging Rates. *Mol. Cell*, **49**, 359–367.
- 431 5. Bell,J.T., Tsai,P.-C., Yang,T.-P., Pidsley,R., Nisbet,J., Glass,D., Mangino,M., Zhai,G.,  
432 Zhang,F., Valdes,A., *et al.* (2012) Epigenome-Wide Scans Identify Differentially Methylated  
433 Regions for Age and Age-Related Phenotypes in a Healthy Ageing Population. *PLoS Genet*, **8**,  
434 e1002629.
- 435 6. Alisch,R.S., Barwick,B.G., Chopra,P., Myrick,L.K., Satten,G.A., Conneely,K.N. and  
436 Warren,S.T. (2012) Age-associated DNA methylation in pediatric populations. *Genome Res.*,  
437 **22**, 623–632.
- 438 7. Johansson,Å., Enroth,S. and Gyllenstein,U. (2013) Continuous Aging of the Human DNA  
439 Methylome Throughout the Human Lifespan. *PLoS ONE*, **8**.
- 440 8. Florath,I., Butterbach,K., Muller,H., Bewerunge-Hudler,M. and Brenner,H. (2014) Cross-  
441 sectional and longitudinal changes in DNA methylation with age: an epigenome-wide analysis  
442 revealing over 60 novel age-associated CpG sites. *Hum. Mol. Genet.*, **23**, 1186–1201.
- 443 9. van Dongen,J., Nivard,M.G., Willemsen,G., Hottenga,J.-J., Helmer,Q., Dolan,C.V., Ehli,E.A.,  
444 Davies,G.E., van Iterson,M., Breeze,C.E., *et al.* (2016) Genetic and environmental influences  
445 interact with age and sex in shaping the human methylome. *Nat. Commun.*, **7**, 11115.

- 446 10. Richardson,B. (2003) Impact of aging on DNA methylation. *Ageing Res. Rev.*, **2**, 245–261.
- 447 11. Liu,Y., Aryee,M.J., Padyukov,L., Fallin,M.D., Hesselberg,E., Runarsson,A., Reinius,L.,  
448 Acevedo,N., Taub,M., Ronninger,M., *et al.* (2013) Epigenome-wide association data  
449 implicate DNA methylation as an intermediary of genetic risk in rheumatoid arthritis. *Nat.*  
450 *Biotechnol.*, **31**, 142–147.
- 451 12. Gaunt,T.R., Shihab,H.A., Hemani,G., Min,J.L., Woodward,G., Lyttleton,O., Zheng,J.,  
452 Duggirala,A., McArdle,W.L., Ho,K., *et al.* (2016) Systematic identification of genetic  
453 influences on methylation across the human life course. *Genome Biol.*, **17**, 61.
- 454 13. Marioni,R.E., Shah,S., McRae,A.F., Chen,B.H., Colicino,E., Harris,S.E., Gibson,J.,  
455 Henders,A.K., Redmond,P., Cox,S.R., *et al.* (2015) DNA methylation age of blood predicts  
456 all-cause mortality in later life. *Genome Biol.*, **16**, 25.
- 457 14. Kaminsky,Z.A., Tang,T., Wang,S.-C., Ptak,C., Oh,G.H.T., Wong,A.H.C., Feldcamp,L.A.,  
458 Virtanen,C., Halfvarson,J., Tysk,C., *et al.* (2009) DNA methylation profiles in monozygotic  
459 and dizygotic twins. *Nat. Genet.*, **41**, 240–245.
- 460 15. Tan,Q., Heijmans,B.T., Hjelmborg,J. v B., Soerensen,M., Christensen,K. and Christiansen,L.  
461 (2016) Epigenetic drift in the aging genome: a ten-year follow-up in an elderly twin cohort. *Int.*  
462 *J. Epidemiol.*, **45**, 1146–1158.
- 463 16. Finkel,D. and Pedersen,N.L. (2004) Processing Speed and Longitudinal Trajectories of  
464 Change for Cognitive Abilities: The Swedish Adoption/Twin Study of Aging. *Ageing*  
465 *Neuropsychol. Cogn.*, **11**, 325–345.
- 466 17. Magnusson,P.K.E., Almqvist,C., Rahman,I., Ganna,A., Viktorin,A., Walum,H., Halldner,L.,  
467 Lundström,S., Ullén,F., Långström,N., *et al.* (2013) The Swedish Twin Registry:  
468 establishment of a biobank and other recent developments. *Twin Res. Hum. Genet. Off. J.*  
469 *Int. Soc. Twin Stud.*, **16**, 317–329.
- 470 18. Lind,L., Fors,N., Hall,J., Marttala,K. and Stenborg,A. (2005) A Comparison of Three Different  
471 Methods to Evaluate Endothelium-Dependent Vasodilation in the Elderly. *Arterioscler.*  
472 *Thromb. Vasc. Biol.*, **25**, 2368–2375.
- 473 19. Deary,I.J., Gow,A.J., Pattie,A. and Starr,J.M. (2012) Cohort Profile: The Lothian Birth  
474 Cohorts of 1921 and 1936. *Int. J. Epidemiol.*, **41**, 1576–1584.
- 475 20. Houseman,E.A., Accomando,W.P., Koestler,D.C., Christensen,B.C., Marsit,C.J.,  
476 Nelson,H.H., Wiencke,J.K. and Kelsey,K.T. (2012) DNA methylation arrays as surrogate  
477 measures of cell mixture distribution. *BMC Bioinformatics*, **13**, 86.
- 478 21. Zerbino,D.R., Johnson,N., Juetteman,T., Sheppard,D., Wilder,S.P., Lavidas,I., Nuhn,M.,  
479 Perry,E., Raffailac-Desfosses,Q., Sobral,D., *et al.* (2016) Ensembl regulation resources.  
480 *Database*, **2016**, bav119.
- 481 22. Huang,D.W., Sherman,B.T. and Lempicki,R.A. (2009) Systematic and integrative analysis of  
482 large gene lists using DAVID bioinformatics resources. *Nat. Protoc.*, **4**, 44–57.

- 483 23. Huang,D.W., Sherman,B.T. and Lempicki,R.A. (2009) Bioinformatics enrichment tools: paths  
484 toward the comprehensive functional analysis of large gene lists. *Nucleic Acids Res.*, **37**, 1–  
485 13.
- 486 24. Jaffe,A.E. and Irizarry,R.A. (2014) Accounting for cellular heterogeneity is critical in  
487 epigenome-wide association studies. *Genome Biol.*, **15**, R31.
- 488 25. Ong,C.-T. and Corces,V.G. (2014) CTCF: an architectural protein bridging genome topology  
489 and function. *Nat. Rev. Genet.*, **15**, 234–246.
- 490 26. Day,K., Waite,L.L., Thalacker-Mercer,A., West,A., Bamman,M.M., Brooks,J.D., Myers,R.M.  
491 and Absher,D. (2013) Differential DNA methylation with age displays both common and  
492 dynamic features across human tissues that are influenced by CpG landscape. *Genome Biol.*,  
493 **14**, R102.
- 494 27. Assenov,Y., Müller,F., Lutsik,P., Walter,J., Lengauer,T. and Bock,C. (2014) Comprehensive  
495 analysis of DNA methylation data with RnBeads. *Nat. Methods*, **11**, 1138–1140.
- 496 28. Triche,T.J., Weisenberger,D.J., Berg,D.V.D., Laird,P.W. and Siegmund,K.D. (2013) Low-  
497 level processing of Illumina Infinium DNA Methylation BeadArrays. *Nucleic Acids Res.*, **41**,  
498 e90–e90.
- 499 29. Pidsley,R., Wong,C.C.Y., Volta,M., Lunnon,K., Mill,J. and Schalkwyk,L.C. (2013) A data-  
500 driven approach to preprocessing Illumina 450K methylation array data. *BMC Genomics*, **14**,  
501 293.
- 502 30. Reinius,L.E., Acevedo,N., Joerink,M., Pershagen,G., Dahlén,S.-E., Greco,D., Söderhäll,C.,  
503 Scheynius,A. and Kere,J. (2012) Differential DNA Methylation in Purified Human Blood Cells:  
504 Implications for Cell Lineage and Studies on Disease Susceptibility. *PLoS ONE*, **7**, e41361.
- 505 31. Sammon,J.W. (1969) A Nonlinear Mapping for Data Structure Analysis. *IEEE Trans.*  
506 *Comput.*, **C-18**, 401–409.
- 507 32. Leek,J.T., Johnson,W.E., Parker,H.S., Jaffe,A.E. and Storey,J.D. (2012) The sva package  
508 for removing batch effects and other unwanted variation in high-throughput experiments.  
509 *Bioinformatics*, **28**, 882–883.
- 510 33. Howie,B.N., Donnelly,P. and Marchini,J. (2009) A Flexible and Accurate Genotype  
511 Imputation Method for the Next Generation of Genome-Wide Association Studies. *PLOS*  
512 *Genet.*, **5**, e1000529.
- 513 34. The 1000 Genomes Project Consortium (2015) A global reference for human genetic  
514 variation. *Nature*, **526**, 68–74.
- 515 35. Hedman,Å.K., Zilmer,M., Sundström,J., Lind,L. and Ingelsson,E. (2016) DNA methylation  
516 patterns associated with oxidative stress in an ageing population. *BMC Med. Genomics*, **9**,  
517 72.
- 518 36. Shabalina,A.A. (2012) Matrix eQTL: ultra fast eQTL analysis via large matrix operations.  
519 *Bioinforma. Oxf. Engl.*, **28**, 1353–1358.

520 37. Zerbino,D.R., Wilder,S.P., Johnson,N., Juettemann,T. and Flicek,P.R. (2015) The Ensembl  
521 Regulatory Build. *Genome Biol.*, **16**, 56.

522

## 523 **Figure title and legends**

524 **Figure 1. The effect sizes of age on age-associated CpGs in SATSA and two independent**  
525 **longitudinal cohorts.** Effect sizes of age were estimated from a longitudinal epigenome-wide associated  
526 study of age in SATSA, using a mixed effect model. The 1316 Bonferroni significant CpGs ( $p < 1.3 \times 10^{-7}$ )  
527 were tested for age associations in PIVUS and LBC. A) The Pearson correlation of the effect sizes is 0.57  
528 ( $p < 10^{-16}$ ) between PIVUS and SATSA. The slope of the linear regression line is 0.63. B) The Pearson  
529 correlation is 0.87 ( $p < 10^{-16}$ ) between SATSA and LBC. The slope of linear regression is 0.96.

530 **Figure 2. Longitudinal changes of cellular compositions with age.** Estimated cellular compositions  
531 were plotted against age for each cell types. Grey lines indicate multiple observations of individuals. P-  
532 values were calculated from a mixed effect model measuring the longitudinal change of cellular  
533 proportions. PBMC, peripheral blood mononuclear cell; NK cell, natural killer cell.

534 **Figure 1. The distribution of age-associated CpGs in relation to CpG islands and regulatory**  
535 **features.** A) Proportions of age-related hyper- and hypomethylated CpGs in different CpG island regions  
536 compared to proportions on the 450k array. Age-associated CpGs are enriched in CpG shores  
537 (North Shore  $p = 3.7 \times 10^{-12}$  and South Shore  $p = 1.8 \times 10^{-18}$ ), and depleted in CpG islands ( $p = 6.6 \times 10^{-7}$ ) and  
538 open sea regions ( $p = 1.1 \times 10^{-17}$ ). Outside of CpG islands, 918 out of 961 CpGs are hypomethylated with  
539 age, and in CpG islands, 247 out of 355 CpGs are hypermethylated with age. B) The proportions of age-  
540 related hyper- and hypomethylation, as well as background CpGs, in different regulatory regions. Age-  
541 associated CpGs are highly enriched in CTCF binding sites ( $p = 3.9 \times 10^{-27}$ ). Only in TF binding sites, the  
542 proportion of age-related hypermethylated CpGs is higher than hypomethylated CpGs. The enrichment or  
543 depletion is shown by p-values calculated from two-sample proportion tests. CpG, cytosine-phosphate-  
544 guanine; ns, non-significant; CTCF, CCCTC-binding factor; TF, transcription factor.

545 **Figure 2. Regression plots of intra-twin-pair methylation differences over time in SATSA.**  
546 Methylation differences within twin pairs at the same time point calculated by Euclidean distances of A) all  
547 CpGs, B) age-associated CpGs, and C) SNP-associated CpGs. Blue lines and points are MZ and red  
548 lines and points are DZ. Methylation differences within twin pairs increase with age, especially in age-

549 associated CpGs. CpG, cytosine-phosphatate-guanine; MZ, monozygotic; DZ, dizygotic; SNP, single  
550 nucleotide polymorphism.

## 551 Tables

552 **Table 1. Characteristics of the longitudinal DNA methylation samples collection in SATSA.**

| Longitudinal wave | Year of sample collection | Number of Participants (new recruits)* | Female Proportion | Age mean (SD) |
|-------------------|---------------------------|----------------------------------------|-------------------|---------------|
| 1                 | 1992-1994                 | 239                                    | 59%               | 68.6 (9.1)    |
| 2                 | 1999-2001                 | 242 (102)                              | 63%               | 71.2 (10.1)   |
| 3                 | 2002-2004                 | 188 (26)                               | 54%               | 72.1 (9.1)    |
| 4                 | 2008-2010                 | 186 (15)                               | 61%               | 76.2 (8.5)    |
| 5                 | 2010-2012                 | 156 (3)                                | 66%               | 77.9 (8.4)    |

553 \* The numbers of newly recruited participants in each wave in parenthesis. 200 participants were available  
554 in at least three waves. SATSA, the Swedish Adoption/Twin Study of Aging; SD, standard deviation.

555 **Table 2. Enriched Gene Ontology terms for genes mapped to the age-associated CpGs.**

| Gene Ontology term                                              | Number of genes | p-value               | FDR                   |
|-----------------------------------------------------------------|-----------------|-----------------------|-----------------------|
| Homophilic cell adhesion via plasma membrane adhesion molecules | 42              | $5.4 \times 10^{-22}$ | $1.0 \times 10^{-18}$ |
| Nervous system development                                      | 147             | $1.3 \times 10^{-9}$  | $2.4 \times 10^{-6}$  |
| Neurogenesis                                                    | 100             | $6.0 \times 10^{-7}$  | $1.1 \times 10^{-3}$  |
| Organ morphogenesis                                             | 73              | $1.2 \times 10^{-6}$  | $2.3 \times 10^{-3}$  |
| Cell development                                                | 121             | $7.2 \times 10^{-6}$  | $1.3 \times 10^{-2}$  |
| Neuron differentiation                                          | 83              | $1.9 \times 10^{-5}$  | $3.4 \times 10^{-2}$  |

556 CpG, cytosine-phosphatate-guanine; FDR, false discovery rate

557



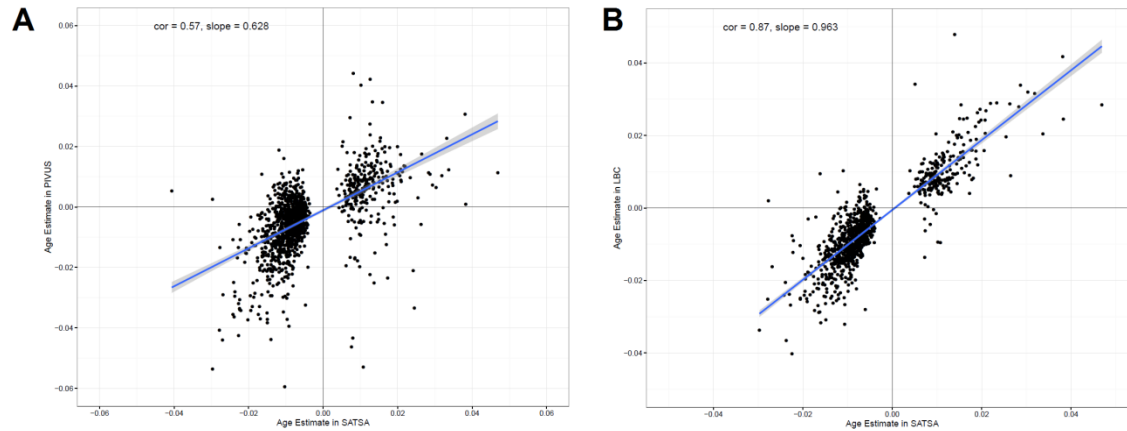

558

559 **Figure 1. The effect sizes of age on age-associated CpGs in SATSA and two independent**  
560 **longitudinal cohorts.** Effect sizes of age were estimated from a longitudinal epigenome-wide associated  
561 study of age in SATSA, using a mixed effect model. The 1316 Bonferroni significant CpGs ( $p < 1.3 \times 10^{-7}$ )  
562 were tested for age associations in PIVUS and LBC. A) The Pearson correlation of the effect sizes is 0.57  
563 ( $p < 10^{-16}$ ) between PIVUS and SATSA. The slope of the linear regression line is 0.63. B) The Pearson  
564 correlation is 0.87 ( $p < 10^{-16}$ ) between SATSA and LBC. The slope of linear regression is 0.96.

565

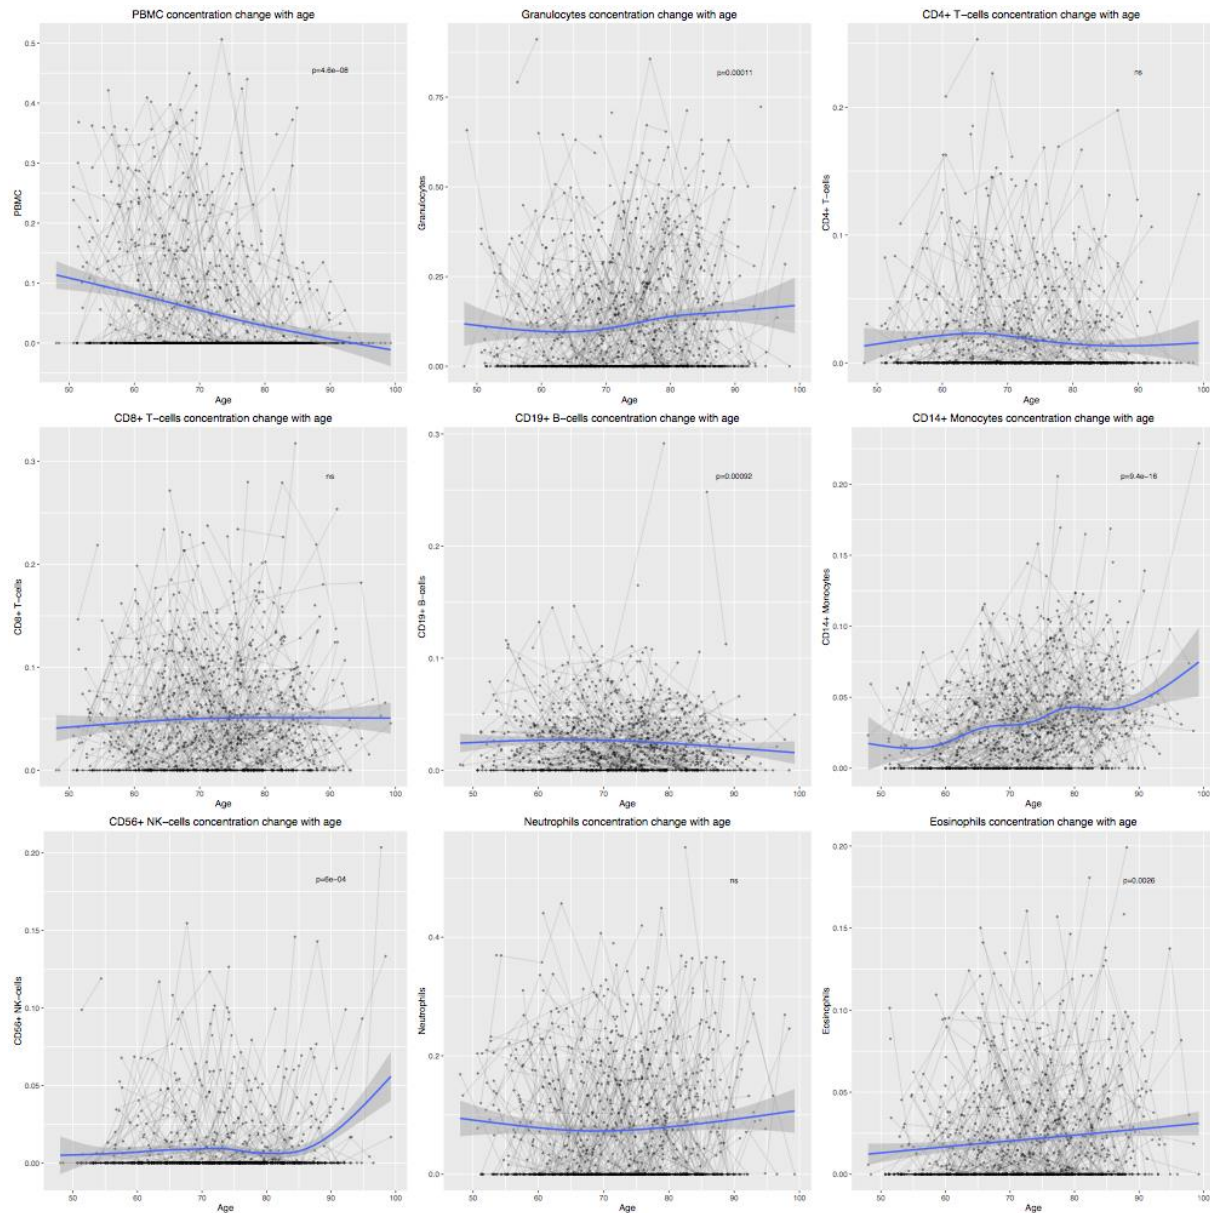

566

567 **Figure 2. Longitudinal changes of cellular compositions with age.** Estimated cellular compositions  
568 were plotted against age for each cell types. Grey lines indicate multiple observations of individuals. P-  
569 values were calculated from a mixed effect model measuring the longitudinal change of cellular  
570 proportions. PBMC, peripheral blood mononuclear cell; NK cell, natrual killer cell

571

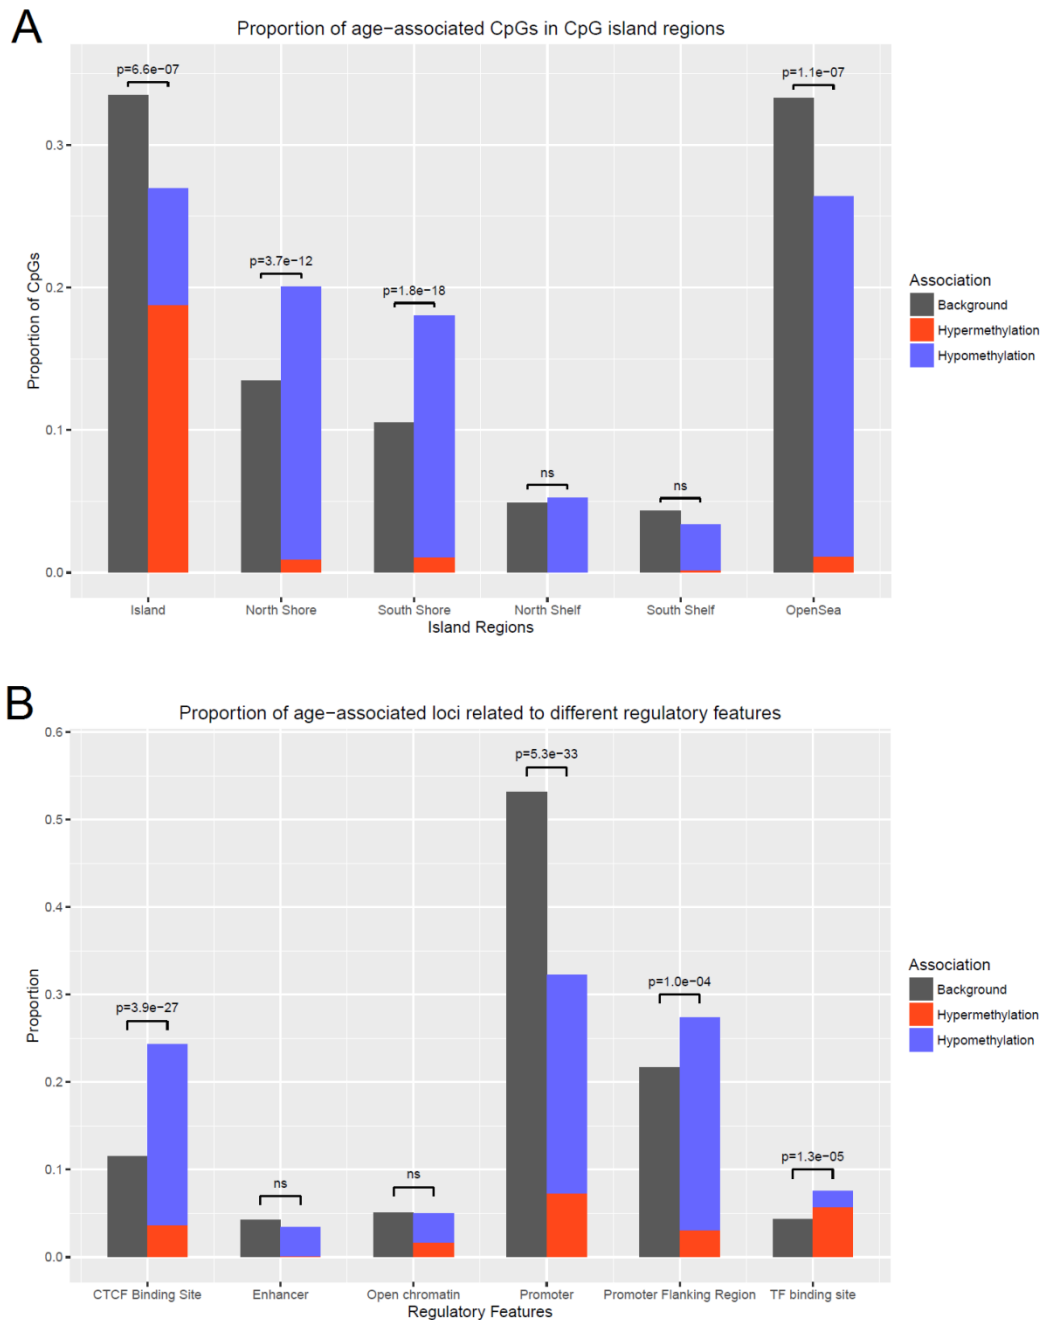

572

573 **Figure 3. The distribution of age-associated CpGs in relation to CpG islands and regulatory**  
 574 **features.** A) Proportions of age-related hyper- and hypomethylated CpGs in different CpG island regions  
 575 compared to proportions on the 450k array. Age-associated CpGs are enriched in CpG shores  
 576 (North Shore  $p=3.7 \times 10^{-12}$  and South Shore  $p=1.8 \times 10^{-18}$ ), and depleted in CpG islands ( $p=6.6 \times 10^{-7}$ ) and

577 open sea regions ( $p=1.1\times 10^{-17}$ ). Outside of CpG islands, 918 out of 961 CpGs are hypomethylated with  
578 age, and in CpG islands, 247 out of 355 CpGs are hypermethylated with age. B) The proportions of age-  
579 related hyper- and hypomethylation, as well as background CpGs, in different regulatory regions. Age-  
580 associated CpGs are highly enriched in CTCF binding sites ( $p=3.9\times 10^{-27}$ ). Only in TF binding sites, the  
581 proportion of age-related hypermethylated CpGs is higher than hypomethylated CpGs. The enrichment or  
582 depletion is shown by p-values calculated from two-sample proportion tests. CpG, cytosine-phosphate-  
583 guanine; ns, non-significant; CTCF, CCCTC-binding factor; TF, transcription factor.

584

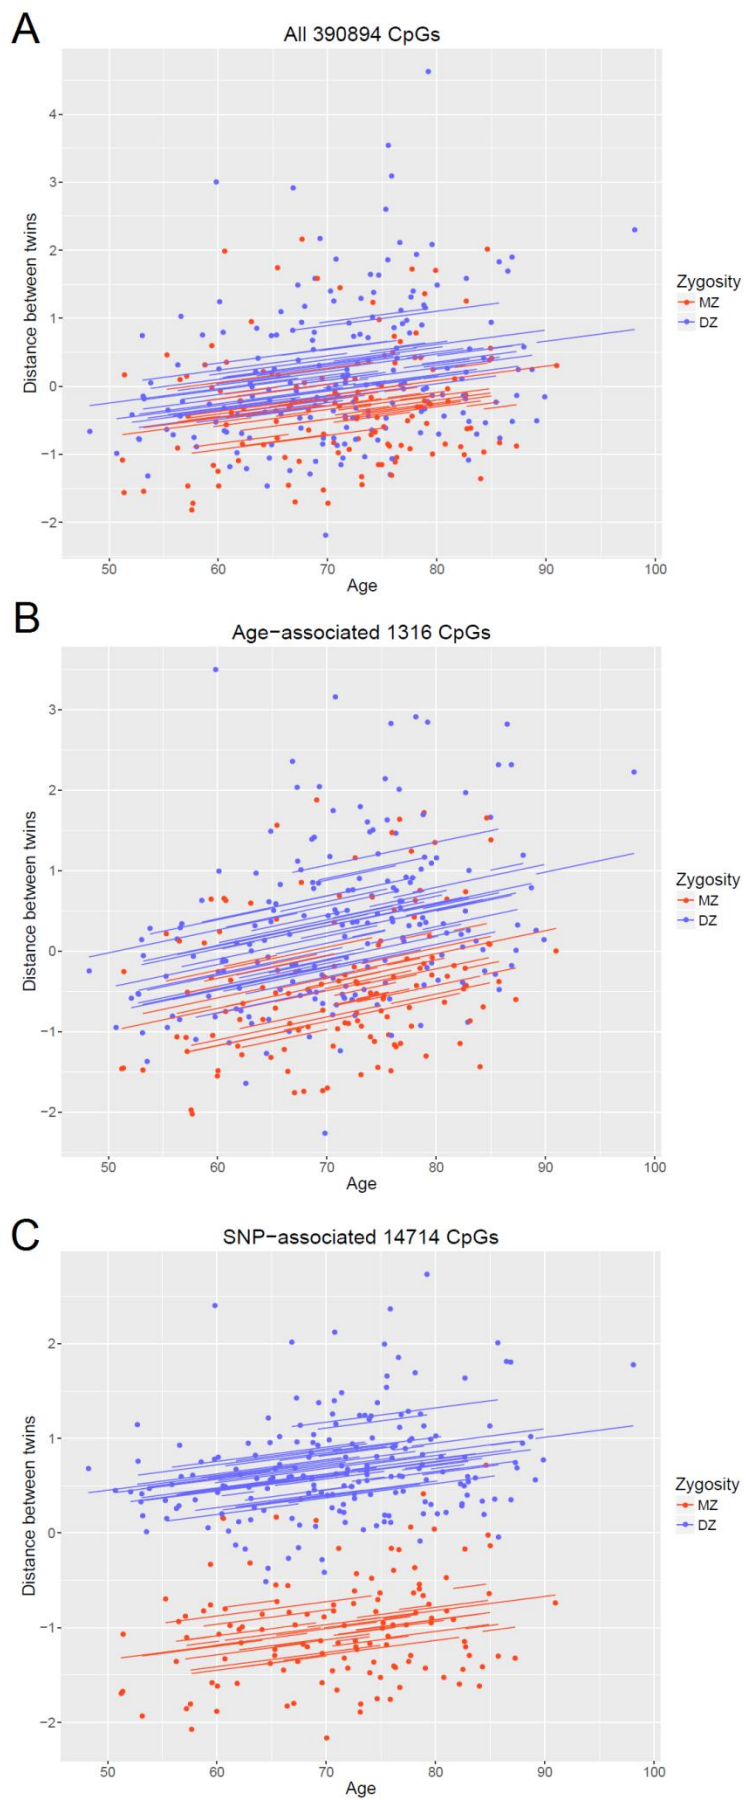

586 **Figure 4. Regression plots of intra-twin-pair methylation differences over time in SATSA.**

587 Methylation differences within twin pairs at the same time point calculated by Euclidean distances of A) all  
588 CpGs, B) age-associated CpGs, and C) SNP-associated CpGs. Blue lines and points are MZ and red  
589 lines and points are DZ. Methylation differences within twin pairs increase with age, especially in age-  
590 associated CpGs. CpG, cytosine-phosphatate-guanine; MZ, monozygotic; DZ, dizygotic; SNP, single  
591 nucleotide polymorphism.

592

593
